# Supplementary material for: Aberrant expression of translationally controlled tumor protein (TCTP) can lead to radioactive susceptibility and chemosensitivity in lung cancer cells
Source: PubMed Central journal article supplement (PMC5731924; doi:10.18632/oncotarget.21747), 2017-10-10
Supplement: oncotarget-08-101922-s001.pdf [file oncotarget-08-101922-s001.pdf]

## Aberrant expression of translationally controlled tumor protein (TCTP) can lead to radioresistance and chemosensitivity in lung cancer cells

### SUPPLEMENTARY MATERIALS

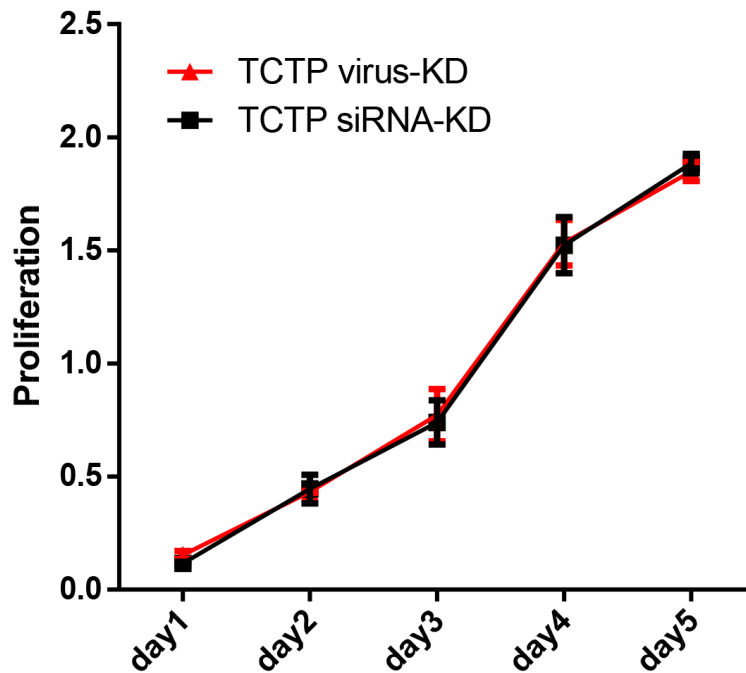

Supplementary Data 1: TCTP knockdown with siRNA or with virus made no significant difference in cell proliferation.

**A siRNA Sequenc List**

UPF1 siRNA: 5'-CCUCCCAUCCAACAUCUUTT  
TCTP siRNA: 5'-UCUCCGACAUCUACAAGAUTT  
P53 siRNA: 5'-GAAGAAAUUUCCGCUUUUTT

**B Primer sequence List**

TCTP-F AGACCAGAAAGAGTAAAA  
TCTP-R TCCACTCCAAATAAATCACAG  
GAPDH-F GCACCGTCAAGGCTGAGAAC  
GAPDH-R TGGTGAAGACGCCAGTGGA

**Supplementary Data 2: all the sequences used**
